# Supplementary material
Source: PubMed Central journal article supplement (PMC3173798)
Supplement: emboj2011279s1.pdf [file emboj2011279s1.pdf]

**Crystal structure of the *Haemophilus influenzae* Hap adhesin reveals an intercellular oligomerization mechanism for bacterial aggregation**

Guoyu Meng<sup>1,\*</sup>, Nicole Spahich<sup>2</sup>, Roma Kenjale<sup>2,#</sup>, Gabriel Waksman<sup>3</sup> and Joseph W. St. Geme, III<sup>2,\*</sup>

<sup>1</sup>State Key Laboratory of Medical Genomics, Shanghai Institute of Hematology, Rui-Jin Hospital affiliated to Shanghai JiaoTong University School of Medicine, 197 Ruijin Er Road, Shanghai 200025, P. R. of China

<sup>2</sup>Department of Pediatrics and Department of Molecular Genetics & Microbiology, Duke University Medical Center, Children's Health Center Rm T901, Durham, NC 27710, USA

<sup>3</sup>Institute of Structural and Molecular Biology at UCL/Birkbeck, Malet Street, London, WE1C 7HX, UK

<sup>#</sup>Current address is Department of Biochemistry, University of North Carolina at Chapel Hill, Chapel Hill, NC 27514

## FIGURE LEGENDS

**Supplementary Figure 1.** A) The  $\sigma_A$ -weighted  $2Fo-Fc$  electron densities of a cross-section of C-terminal  $\beta$ -helix, i.e. residues 801-825, in the self-associating autotransporter (SAAT) domain is countered at  $1 \sigma$ . B) Sequence of *H. influenzae* Hap<sub>S</sub> and the secondary structure assignment. The strictly conserved catalytic triad, residues His98, Asp140 and Ser243, are highlighted with yellow boxes. The residues that separate the functional domains of Hap<sub>S</sub> are colored with red boxes and the residues in SD1-4 subdomains are colored with green boxes. C) Relative location of the serine protease domain. The surface is colored according to the electrostatic surface potential (negative charges  $-4K_B T$  in red and positive charges  $+4K_B T$  in blue, with linear interpolation in between). The helical core is shown in a ribbon diagram and colored in grey. The subdomains protruding from the helical spine are labeled and colored in green. The surface diagrams were prepared using programs APBS (Baker *et al*, 2001) and Pymol.

**Supplementary Figure 2.** Structural comparison between Hap, Hbp and IgA1. A, B) Structural superimposition of the  $\beta$ -spine from *H. influenzae* Hap<sub>S</sub> (red) and *E. coli* Hbp (blue) and *H. influenzae* IgA1 protease (green). A major architectural variation, SD2 sub-domain, is labelled. C, D) Structural superimposition between the upper parts of Hap<sub>S</sub> (red), Hbp (blue) and IgA1 protease (green). The serine protease domain from Hap<sub>S</sub> is colored in magenta. SD1-4 sub-domains are labelled.

**Supplementary Figure 3.** Intra-molecular interactions between serine protease domain and SD1 sub-domain (A),  $\beta$ -spine (B), SD3 sub-domain (C), SD4 sub-domain (D). Residues involved in hydrogen bonding network are shown in stick and labelled with different colors, i.e. black for those residues in serine protease domain and red for the rest of the structure. The residues that are strictly conserved among Hap, Hbp and IgA1 are underlined in the figure. Hydrogen bonds are shown in dashed lines.

**Supplementary Figure 4.** The conserved inner core of SAAT domain. A, B) Side and top views of the conserved hydrophobic residues in the inner core of  $\beta$ -helix between residues 732-801. The residues are shown in stick representation. Blue and red colors are used to highlight the repetitive nature in this region. C) Sequence alignment of different turns of  $\beta$ -helix between residues 732-801, suggest a (I/V)XLXXXXX(A/F)X(V/L) sequence motif. These four positions are indicated above the sequence alignment. The orientations of the side-chains of the Ile, Leu, Ala, and Val residues in the  $\beta$ -helix turns of residues 732-742 and residues 772-782 are nearly identical. The same applies to the Val, Leu, Phe, and Leu residues in the  $\beta$ -helix turns of residues 752-762 and 791-801. This repetitive nature is highlighted with green and black arrows on the side of sequence alignment.

**Supplementary Figure 5.** Overall protein architecture is important for SAAT-type assembly. Sub-domain 2 might play an important structural role in shaping autotransporters into different functional entities such as proteases and self-associating cell-linkers (Figure 8BE). The recent structure of an Hbp mutant (Pdb code: 3AK5),

(Nishimura et al, 2010) shows that deletion of Hbp sub-domain 2 can promote a Hap<sub>S</sub>-like packing, suggesting that the overall architecture of the protein is important for the function of the SAATs. A) Hbp mutants packing in a *trans* configuration. B) Hbp mutants packing in a Hap<sub>S</sub>-Hap<sub>S</sub>-like assembly. Despite Hbp mutant can mimic a SAAT-type binding, but due to the lack of self-complementary surface, the Hbp-Hbp packing is much loose with inter-molecular distance >10Å.

**Supplementary Figure 6.** Sequence and structural comparison between *H. influenzae* Hap<sub>S</sub> and other self-associating autotransporters. A) Sequence alignment of the SAAT domains from different self-associating autotransporters, including IcsA from *Shigella flexneri* (gi 34101173), AIDA-I from *Escherichia coli* O157:H7 str. Sakai (gi 15830650), hypothetical protein CV\_0837 from *Chromobacterium violaceum* ATCC 12472 (gi 34496292), YfaL from *Escherichia coli* (gi 2506696), YapG from *Yersinia pestis* (gi 10945162), hypothetical protein SMC02406 from *Sinorhizobium meliloti* 1021 (gi 15964814), AIDA from *Burkholderia cepacia* R1808 (gi 46323824), Antigen 43 from *Escherichia coli* (gi 2506898) and AIDA from *Burkholderia cepacia* R18194 (gi 46317444). Red and blue represent strictly and relatively conserved residues, respectively (Marchler-Bauer et al, 2009). B) Structural superimposition of the crystal structure of *H. influenzae* Hap<sub>S</sub> (green) and the homology model of *E. coli* AIDA-I (black). The AIDA-I homology model was generated using the standard protocol implemented in SwissModel (<http://swissmodel.expasy.org>).

**Supplementary Figure 7.** Hap-mediated interbacterial interaction is enhanced by the presence of secretory leukocyte peptidase inhibitor (SLPI). For the purpose of illustration, only two Hap<sub>S</sub> molecules are shown in different surfaces colored in magenta and by electrostatic potential. The SLPIs are shown in space-filled representations and colored in cyan. The dashed line is used to represent the linking polypeptide, i.e. residues 977-1036, between Hap<sub>S</sub> and membrane embedded Hap<sub>β</sub>. OM stands for outer membrane. The distance of two adjacent C $\alpha$  atoms in a  $\beta$ -strand conformation is about 2.3 Å. Therefore, if loop 977-1036 is fully stretched, the predicted distance between Hap<sub>S</sub> and Hap<sub>β</sub> can be  $\sim 135$ Å, leaving plenty of space of membrane-bound Hap to interact with each other.

**Supplementary Figure 8.** Hap<sub>S</sub>-Hap<sub>S</sub> in *cis* configuration derived from the self-association is agreeable with published Hbp<sub>β</sub>:Hbp<sub>β</sub> (a Hap<sub>β</sub> homolog) packing. The SAAT domains are bracketed, and the inter-molecular distance between the self-adhesive domains in this configuration is  $>14$  Å, implying the *cis* packing is driven by oligomerization *in trans*. The Hbp<sub>β</sub> structures (PDB code: 3AEH), (Tajima et al, 2010), which are in scale with Hap<sub>S</sub> structures, are used to judge whether the oligomerization of Hap<sub>S</sub> presented in this manuscript will leave enough packing space for the membrane anchoring domain, Hap<sub>β</sub>.

# Supplementary Figure 1 Meng et al, 2011

A

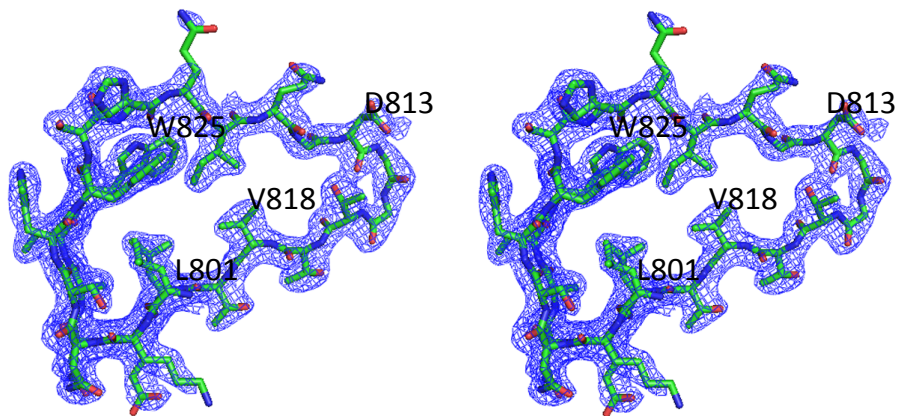

C

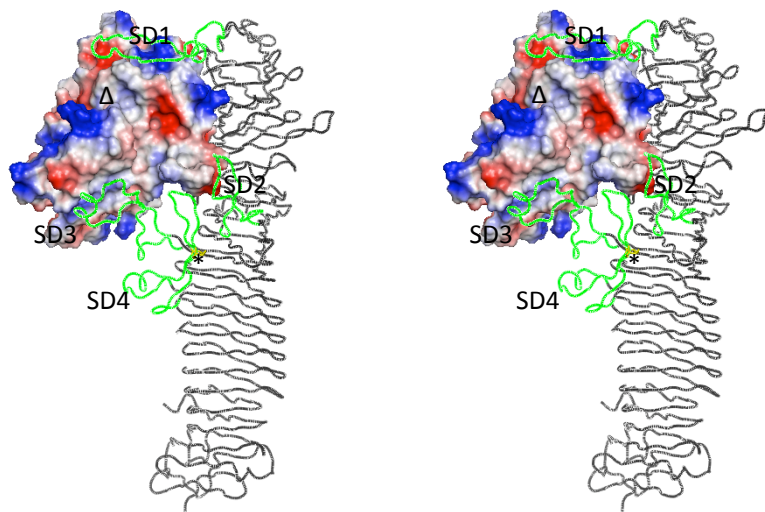

B

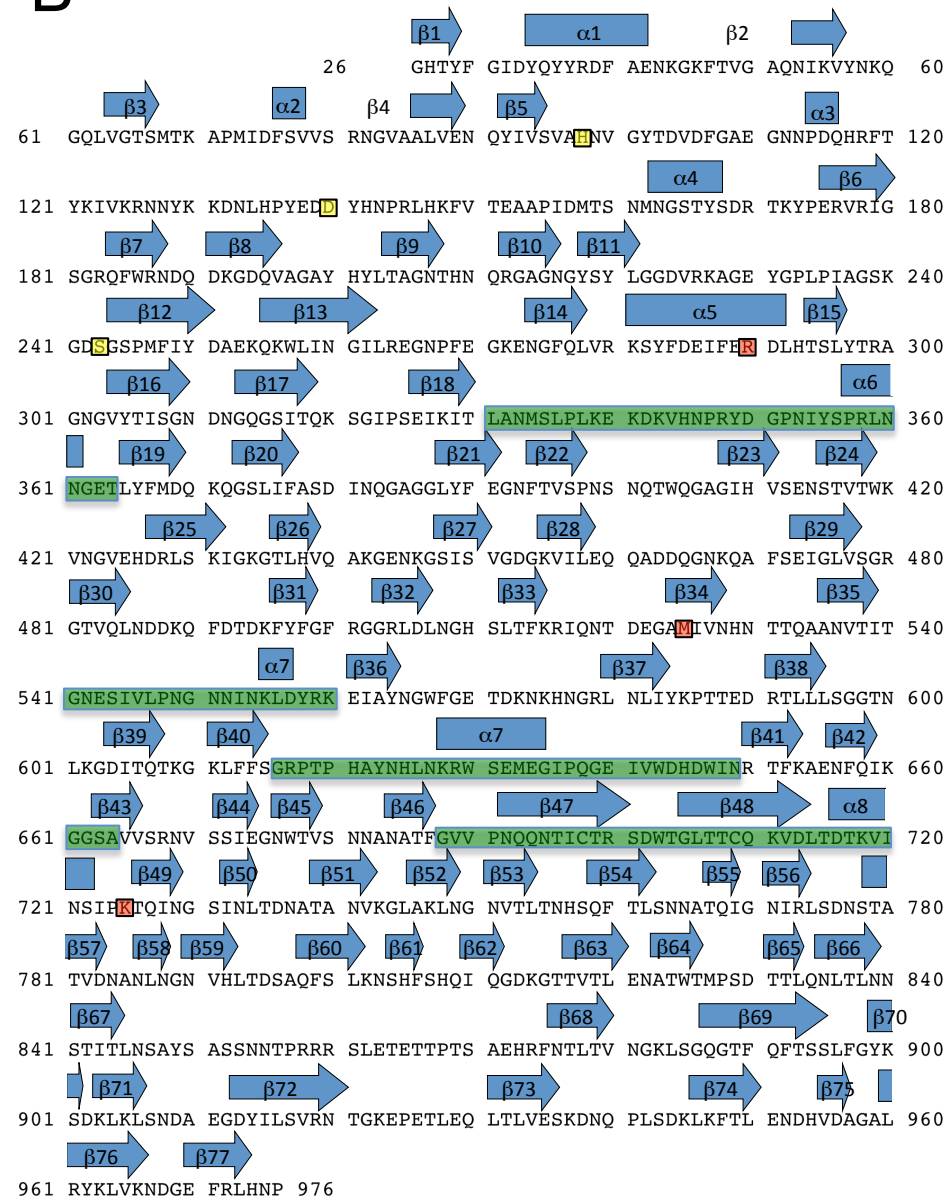

# Supplementary Figure 2 Meng et al, 2011

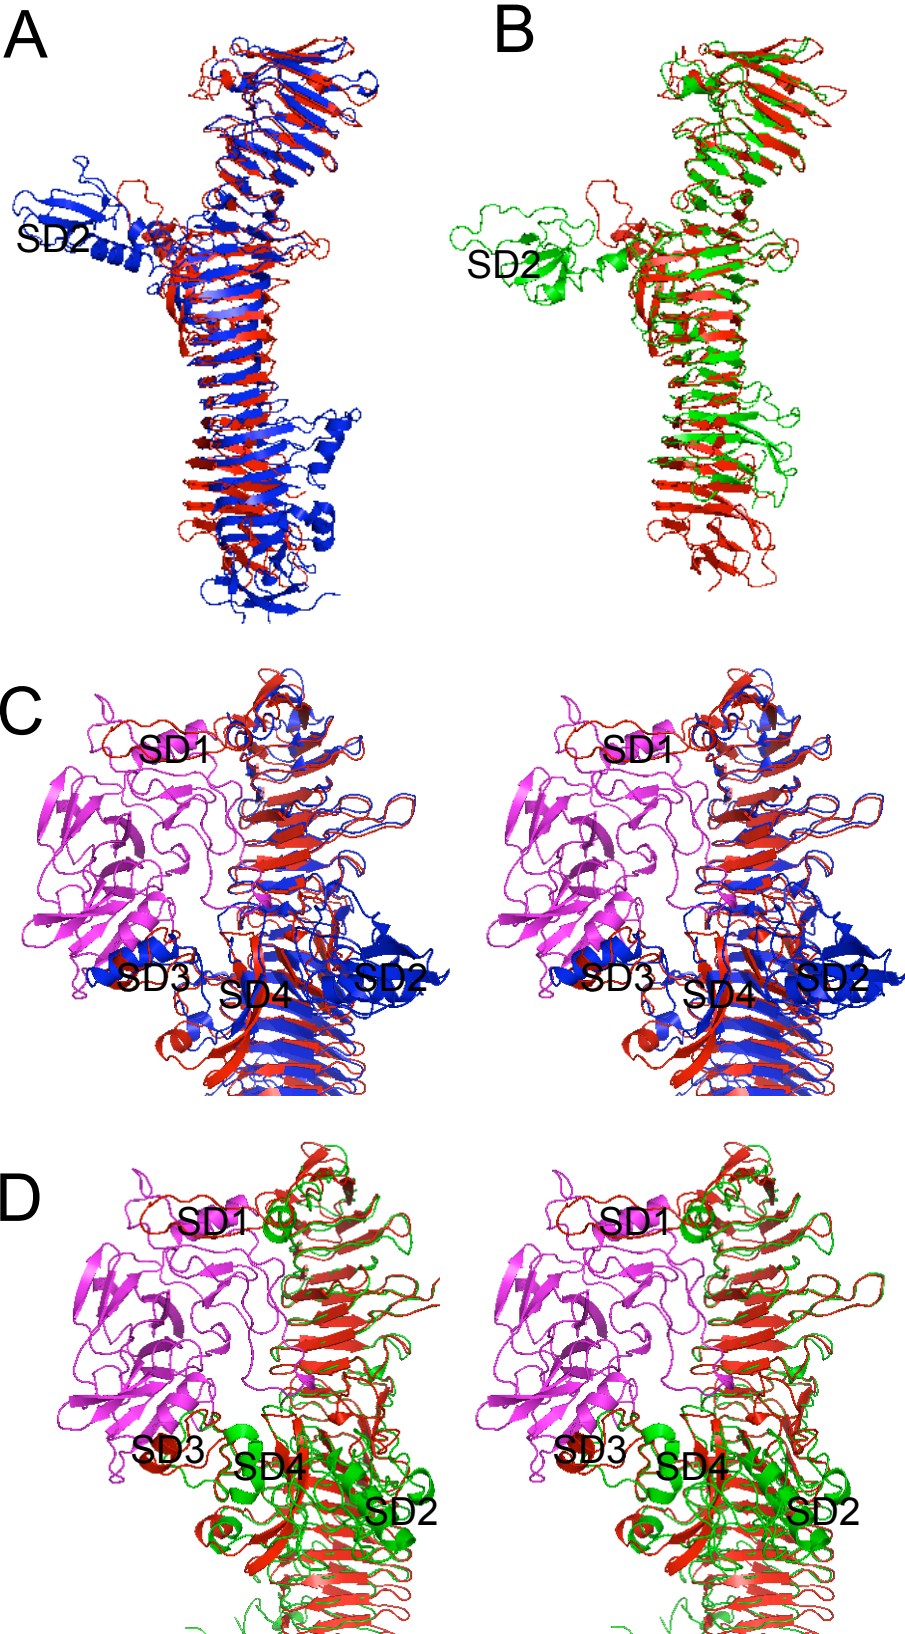

# Supplementary Figure 3 Meng et al, 2011

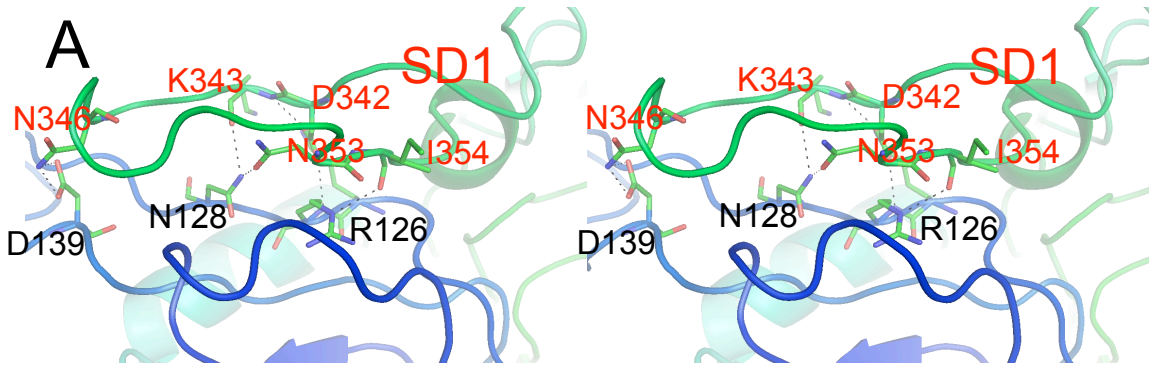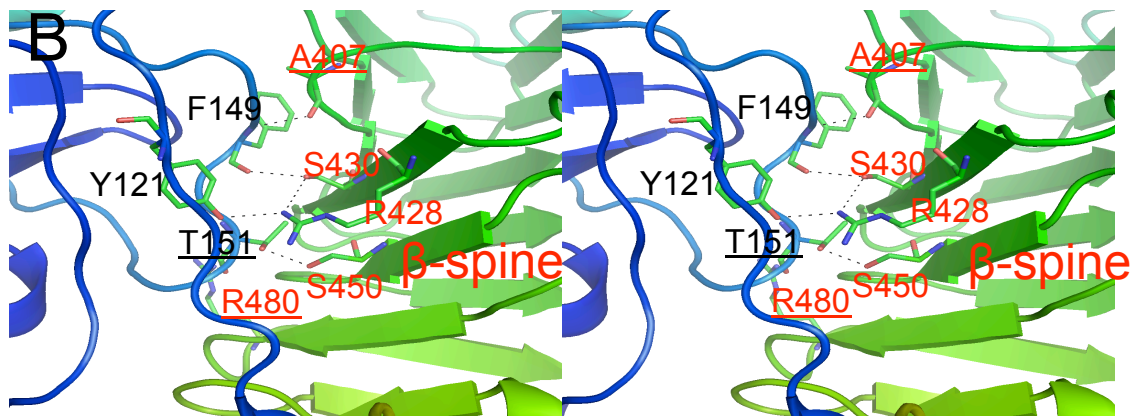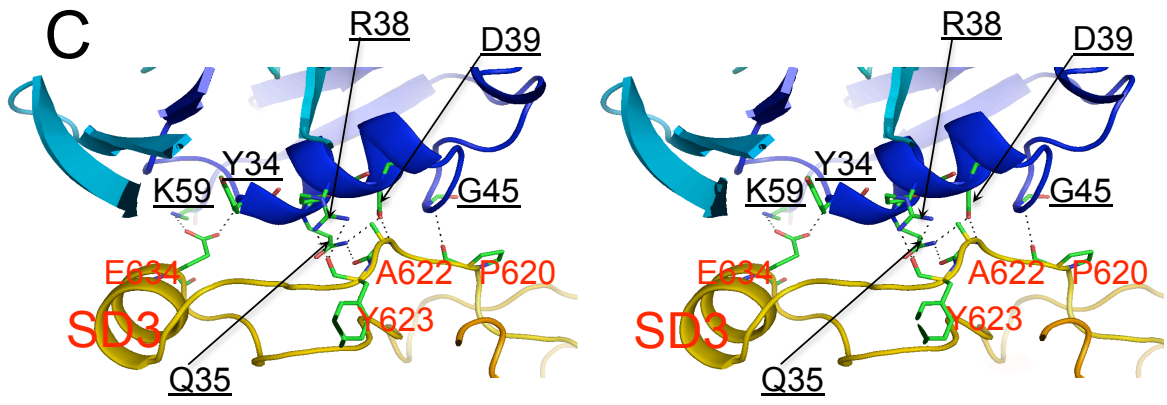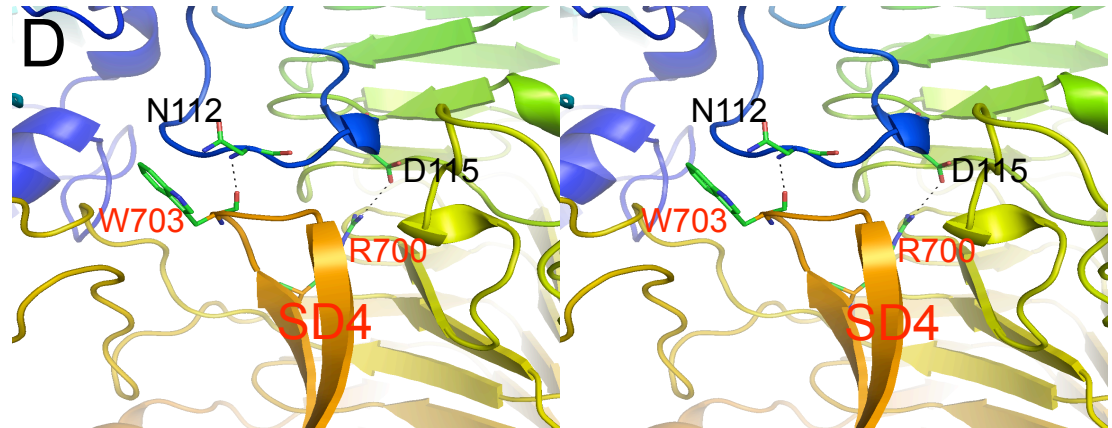



# Supplementary Figure 4 Meng et al, 2011

A

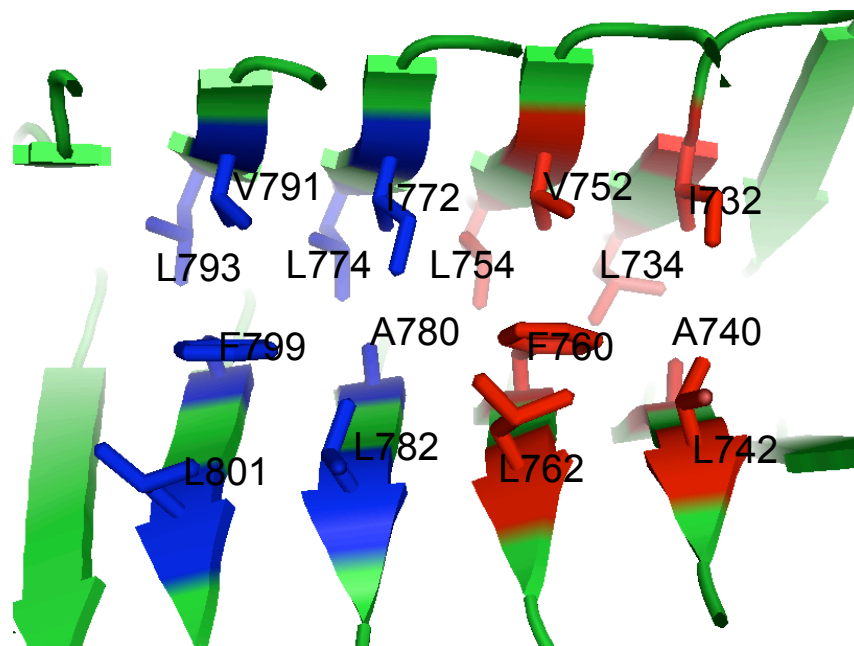

B

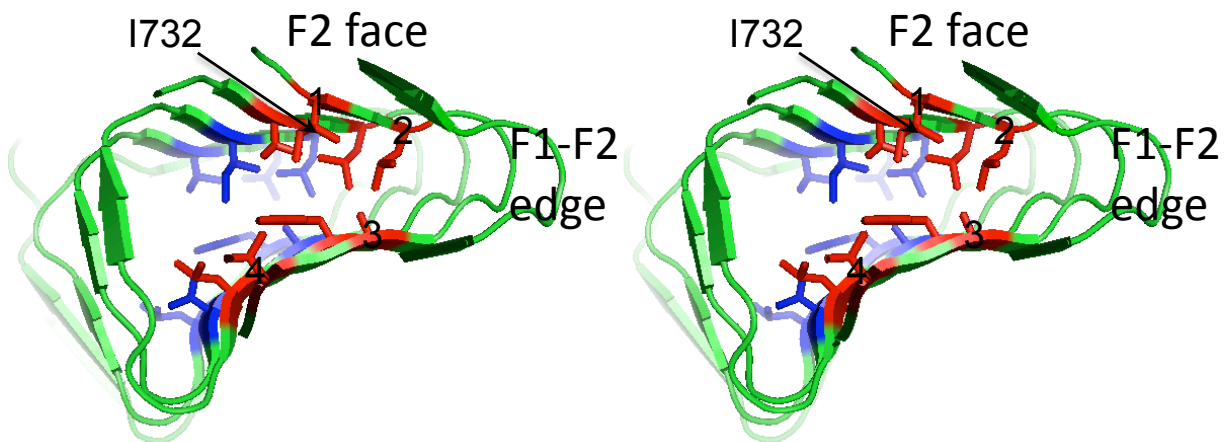

C

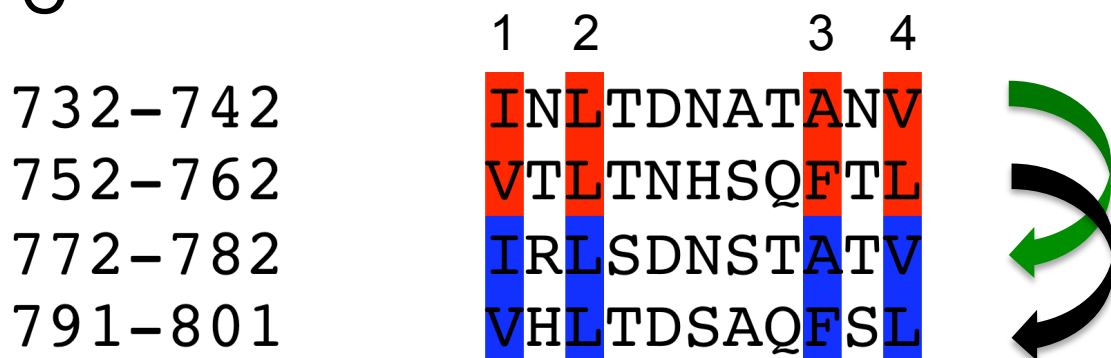

# Supplementary Figure 5 Meng et al, 2011

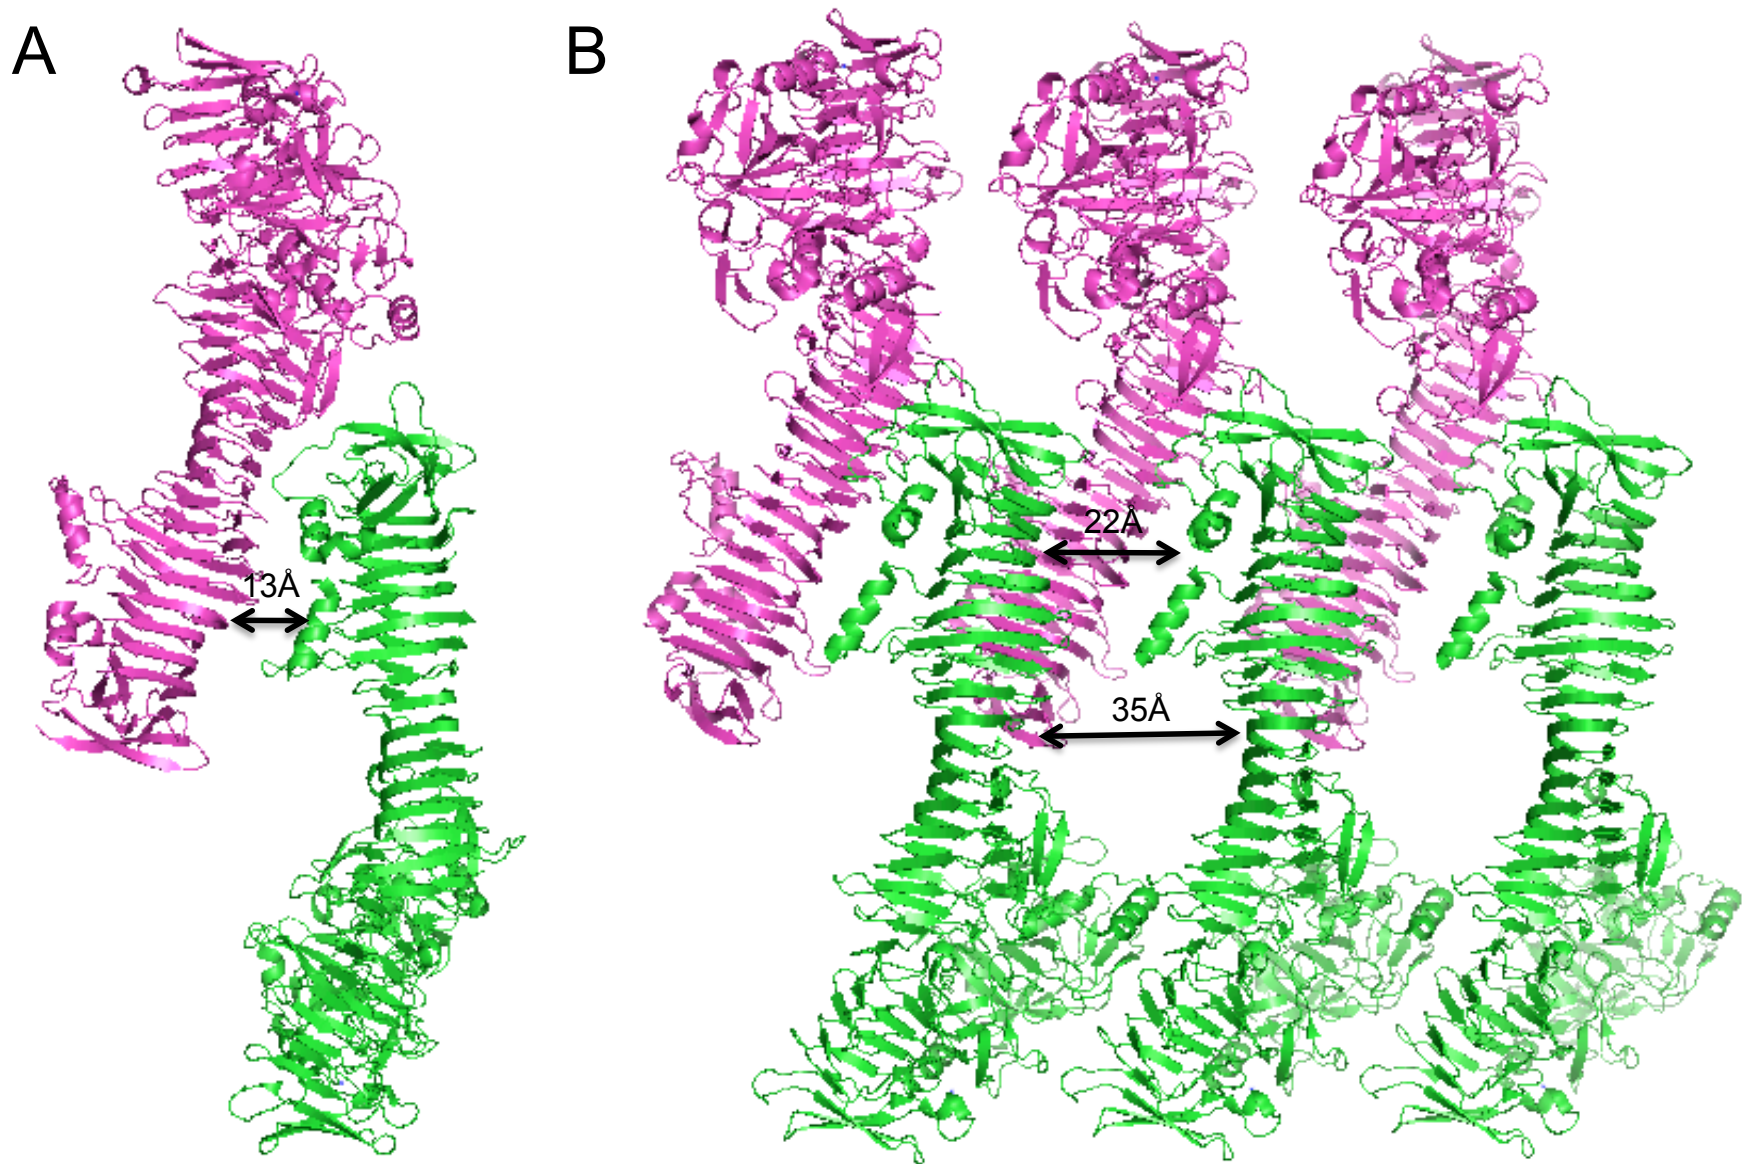

# Supplementary Figure 6 Meng et al, 2011

## A

|                                                                                                 |     | 10       | 20            | 30         | 40         | 50            | 60           | 70            | 80           |              |                |            |             |     |
|-------------------------------------------------------------------------------------------------|-----|----------|---------------|------------|------------|---------------|--------------|---------------|--------------|--------------|----------------|------------|-------------|-----|
| gi 34101173                                                                                     | 557 | GTVEa    | ---MTRTa      | --GVIVnk   | --gaTLNFsg | ---mNOTV      | --NTLLNsg    | -----tVLINn   | -INAPflp     | --dpVIVTG    | 612            |            |             |     |
| gi 15830650                                                                                     | 423 | GSFTvn   | --aGQQA       | g---NTTVgh | --rgTLTLA  | ----aGGSLS    | --GRTQLskgas | ---mvlngD     | VVstGDIVn    | -----aGEIRF  | 484            |            |             |     |
| gi 34496292                                                                                     | 601 | NYVAg    | ---VQNVava    | QINGv      | ----fNNAd  | ----gVLRV     | --LAVNapg    | -----sVNNA    | --GAWQt      | ggsglpGNGVV  | 656            |            |             |     |
| gi 2506696                                                                                      | 718 | QDIQsi   | --dAISSg      | --TIDIsd   | --gtVLRLt  | gg--dtSVALn   | --ASLFNg     | gdgtlvnat     | gdgVTLTge    | LNTNl        | -----eTDSL     | 784        |             |     |
| gi 10945162                                                                                     | 296 | GETHIn   | --agNLKLa     | --NTHFfg   | ---sPISGnp | --ntRLILek    | STLDTtvq     | ----gssVFID   | khsiWNm      | -----lGDSNI  | 357            |            |             |     |
| gi 15964814                                                                                     | 722 | ANIVnw   | --eIVTLda     | adVTIld    | ---gALEAg  | sepetGLFLtn   | GSVLNgsdaf   | --alagnMAID   | gtSQFIa      | -----fGEDIA  | 790            |            |             |     |
| gi 46323824                                                                                     | 403 | VRLTld   | --tGSHAY      | --gDIVNhp  | addgSPTPal | ---tDVALS     | --NASTWtgat  | --avrtLSL     | sdSRWvt      | -----aDSSVG  | 469            |            |             |     |
| gi 2506898                                                                                      | 517 | GTLTl    | ---nDSTVt     | --tDVIaqr  | --gtALKL   | ---gSTVLn     | --GAIDPtn    | -----vtLASG   | --ATWNip     | d--natVQSVV  | 575            |            |             |     |
| gi 46317444                                                                                     | 551 | GLGgp    | ---aTMTGg     | --gMVRIe   | ---pGATFg  | ---gYGSVa     | --GDVVnyg    | -----tvSVANal | SGLAsgh      | --tgnLEIKG   | 609            |            |             |     |
| .....*..... .....*..... .....*..... .....*..... .....*..... .....*..... .....*..... .....*..... |     |          |               |            |            |               |              |               |              |              |                |            |             |     |
| gi 34101173                                                                                     | 613 | n        | -----MTLEKn   | --GHVILn   | nnsss      | -----nvvgq    | TYVQk        | -----GNWHGK   | g--GILSL     | --GAVLGNDn   | --SKTDRLE      | 665        |             |     |
| gi 15830650                                                                                     | 485 | dn       | -----gtTPNAAL | --SRAVaks  | ns         | -----pvtfHKL  | Tt           | -----TNLTGQ   | g--GTINM     | --RVRLDGS    | ---NASDQLV     | 538        |             |     |
| gi 34496292                                                                                     | 657 | qqgl     | --tgvSNFN     | ns--GTITL  | qsadigaag  | avagkLLVI     | tggqtagas    | ggGTYTSN      | g--GQLRL     | --DAVLNQG    | gaaSLNDMLV     | 732        |             |     |
| gi 2506696                                                                                      | 785 | ylsnvtvn | GNLNTs        | GAVSLqngv  | -----agdT  | TLTVn         | -----GDYTTG  | --GTLLE       | --DSELNG     | dd--SVSDQLV  | 842            |            |             |     |
| gi 10945162                                                                                     | 358 | h        | -----hLDILDs  | --GRHDL    | nnpg       | -----ktgnQLI  | IIn          | -----GDYFSD   | n--GTLIF     | --HSQLAG     | dd--SVTDHIL    | 410        |             |     |
| gi 15964814                                                                                     | 791 | ngvy     | --sisGNLV     | na--GTVDM  | qddg       | -----tgdVLSV  | g            | -----GNYTGA   | enSTVYI      | --DTYLGDD    | a--SPTDHIT     | 848        |             |     |
| gi 46323824                                                                                     | 470 | s        | -----VALNDs   | --TIAFA    | epvar      | ---alatp      | RTLvv        | -----tGDYAAH  | n--GKLV      | --HTTLQDD    | a--SPTDRLV     | 524        |             |     |
| gi 2506898                                                                                      | 576 |          | -----DDLSha   | --GQIHft   | strt       | ---gkfv       | pATLkv       | -----KNLNGQ   | n--GTISL     | --RVRPDMA    | g--NNADR       | 628        |             |     |
| gi 46317444                                                                                     | 610 | dl       | ---tnAGLLQ    | l--GGSGV   | g          | -----nLTTI    | i            | -----gGYSQ    | Sg--GTAV     | --NTYLAD     | g--AASDRLI     | 659        |             |     |
| .....*..... .....*..... .....*..... .....*..... .....*..... .....*..... .....*..... .....*..... |     |          |               |            |            |               |              |               |              |              |                |            |             |     |
| gi 34101173                                                                                     | 666 | It       | ---GHASG      | ITYVAVT    | NEGGSG     | dd---kTLEGV   | QIISTds      | -----sDKNAF   | IQK          | g-----RIVAGS | YDYRLKQ        | 722        |             |     |
| gi 15830650                                                                                     | 539 | In       | ---gQATG      | KTWLAFT    | NVGNs      | nlgv--atTGG   | IRVVDA       | ngq--attEEG   | AFALS        | r-----PLQAG  | AFNYTLNR       | 602        |             |     |
| gi 34496292                                                                                     | 733 | Vdrta    | VSGG          | GATRVSVN   | NVGGLG     | gytgng        | PSDGI        | ELIKVl        | da--gysAANAF | SLAa         | -----PLGAG     | AFQYSLRQ   | 799         |     |
| gi 2506696                                                                                      | 843 | Mn       | ---GNTAG      | NTTVV      | VNSITG     | Ige---pTSTG   | IKVVDF       | aadptq        | fgNNAQF      | SLAg         | -----gYVNM     | GAYDYTLVE  | 906         |     |
| gi 10945162                                                                                     | 411 | Ik       | ---GNTGG      | HNTVR      | VINV       | NEGEn---kTDSG | IQLEIV       | rg---iSDG     | EFSQV        | g-----RITAG  | AYEYRLGR       | 467        |             |     |
| gi 15964814                                                                                     | 849 | Vg       | ---GDTAG      | STAI       | SIGNAG     | GPSa---gTVAG  | IRVVG        | vag---aSSG    | TFVLAN       | anseiket     | geaAITRG       | AYAYALRQ   | 916         |     |
| gi 46323824                                                                                     | 525 | Id       | ---gGHA       | AGDTG      | I          | VVKRAG        | GTga---gTTVG | IPIVET        | rng--gttDVS  | AFTL         | dagsdgy--ragfg | TL         | SAGGYDYMLER | 595 |
| gi 2506898                                                                                      | 629 | Id       | ---gGRAT      | GKTI       | LNLV       | NAGNS         | agql--atSGK  | GIVVEA        | ing--attEEG  | AFVQ         | gn-----RLQAG   | AFNYSLNR   | 692         |     |
| gi 46317444                                                                                     | 660 | Vg       | ---aggID      | GSSMLK     | VTVN       | VGPG          | gaq---tTGDG  | IEVVQV        | tng--atsSAG  | AFSLS        | g-----gTVS     | GAGYSYFLAK | 722         |     |
| .....*..... .....*..... .....*..... .....*..... .....*..... .....*..... .....*..... .....*..... |     |          |               |            |            |               |              |               |              |              |                |            |             |     |
| gi 34101173                                                                                     | 723 | gtvsglnt | NKWY          | LTSQMD     | NQ         | 742           |              |               |              |              |                |            |             |     |
| gi 15830650                                                                                     | 603 | ds       | -----dEDWY    | LRS        | ENAYR      | 617           |              |               |              |              |                |            |             |     |
| gi 34496292                                                                                     | 800 | ad       | -----gQNWY    | LQTTDL     | VLP        | 814           |              |               |              |              |                |            |             |     |
| gi 2506696                                                                                      | 907 | d        | -----nNDWY    | LRSQ       | EVTP       | 920           |              |               |              |              |                |            |             |     |
| gi 10945162                                                                                     | 468 | gkd      | ---elsKNWY    | LSSD       | ITDY       | 485           |              |               |              |              |                |            |             |     |
| gi 15964814                                                                                     | 917 | vd       | -----nDDWY    | LQSTL      | AED        | 931           |              |               |              |              |                |            |             |     |
| gi 46323824                                                                                     | 596 | ggrg     | --grtDDWY     | LVSAA      | QPQ        | 614           |              |               |              |              |                |            |             |     |
| gi 2506898                                                                                      | 693 | ds       | -----dESWY    | LRS        | ENAYR      | 707           |              |               |              |              |                |            |             |     |
| gi 46317444                                                                                     | 723 | ggaatgtg | DNWY          | LRNTV      | PPK        | 742           |              |               |              |              |                |            |             |     |

## B

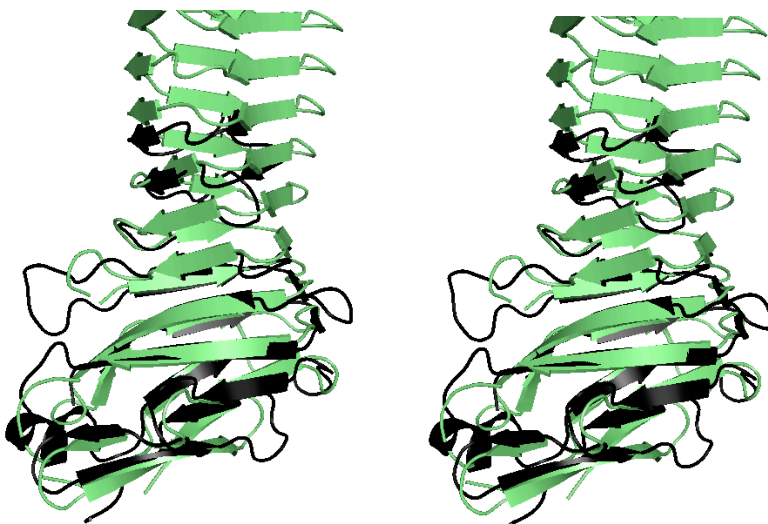

# Supplementary Figure 7 Meng et al, 2011

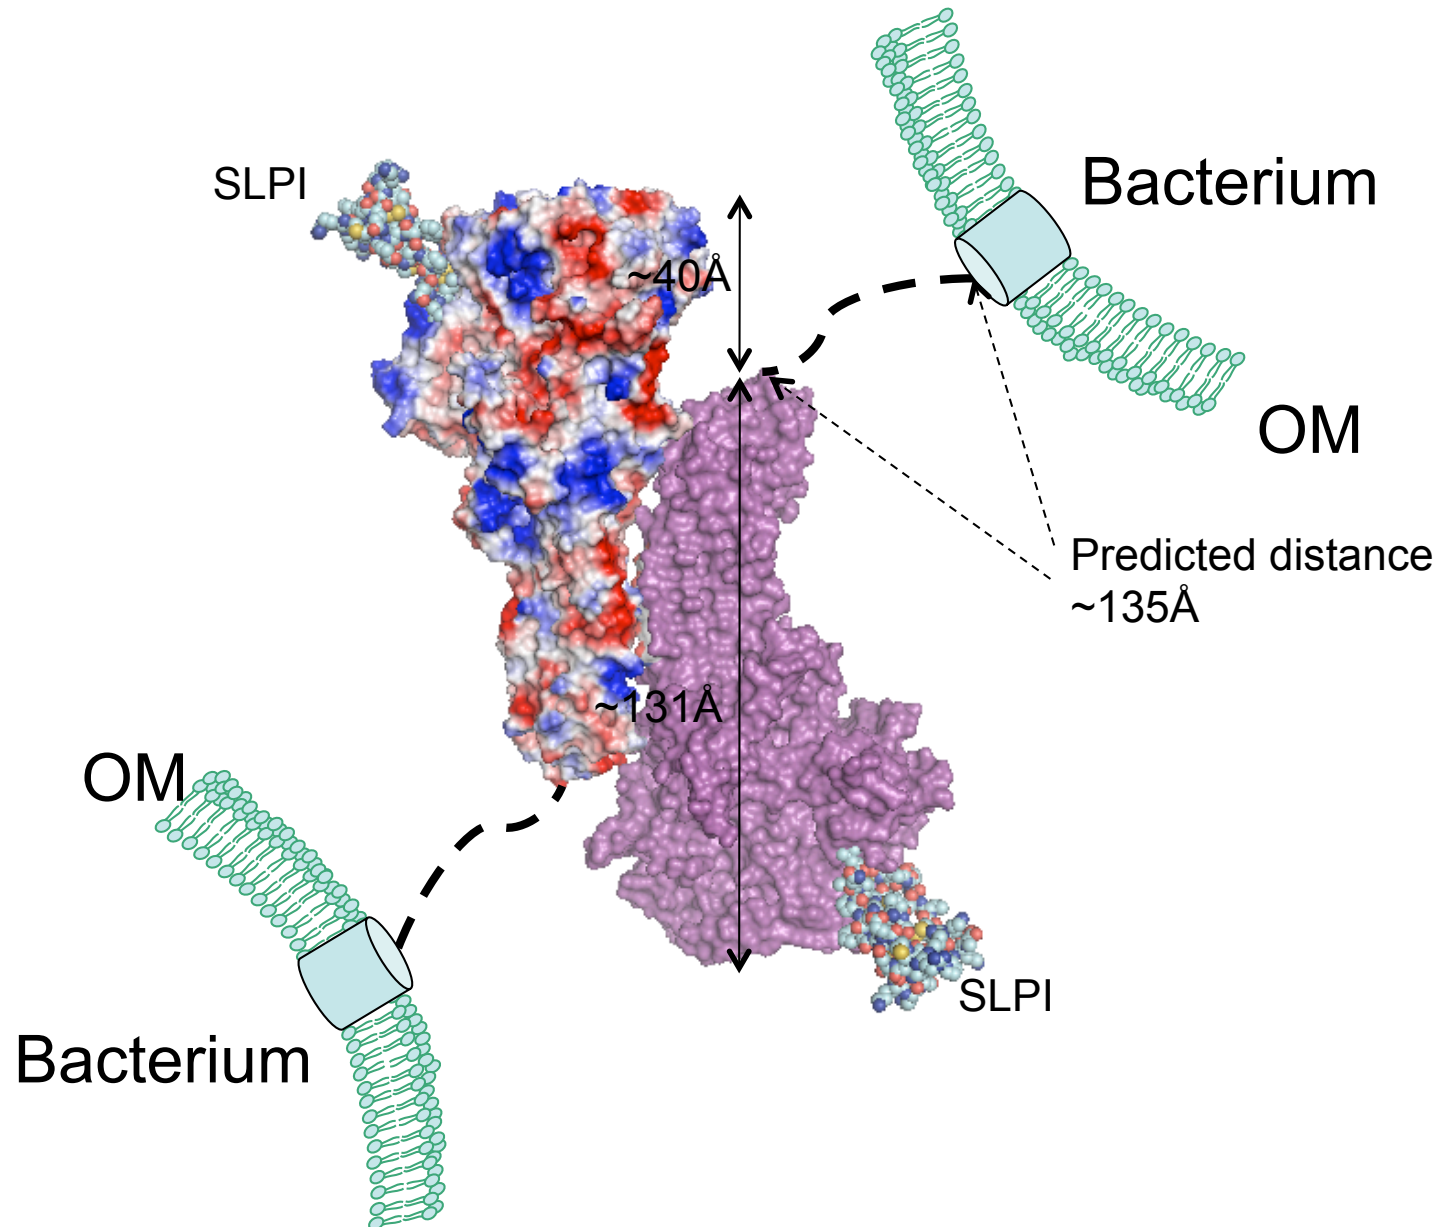

# Supplementary Figure 8 Meng et al, 2011

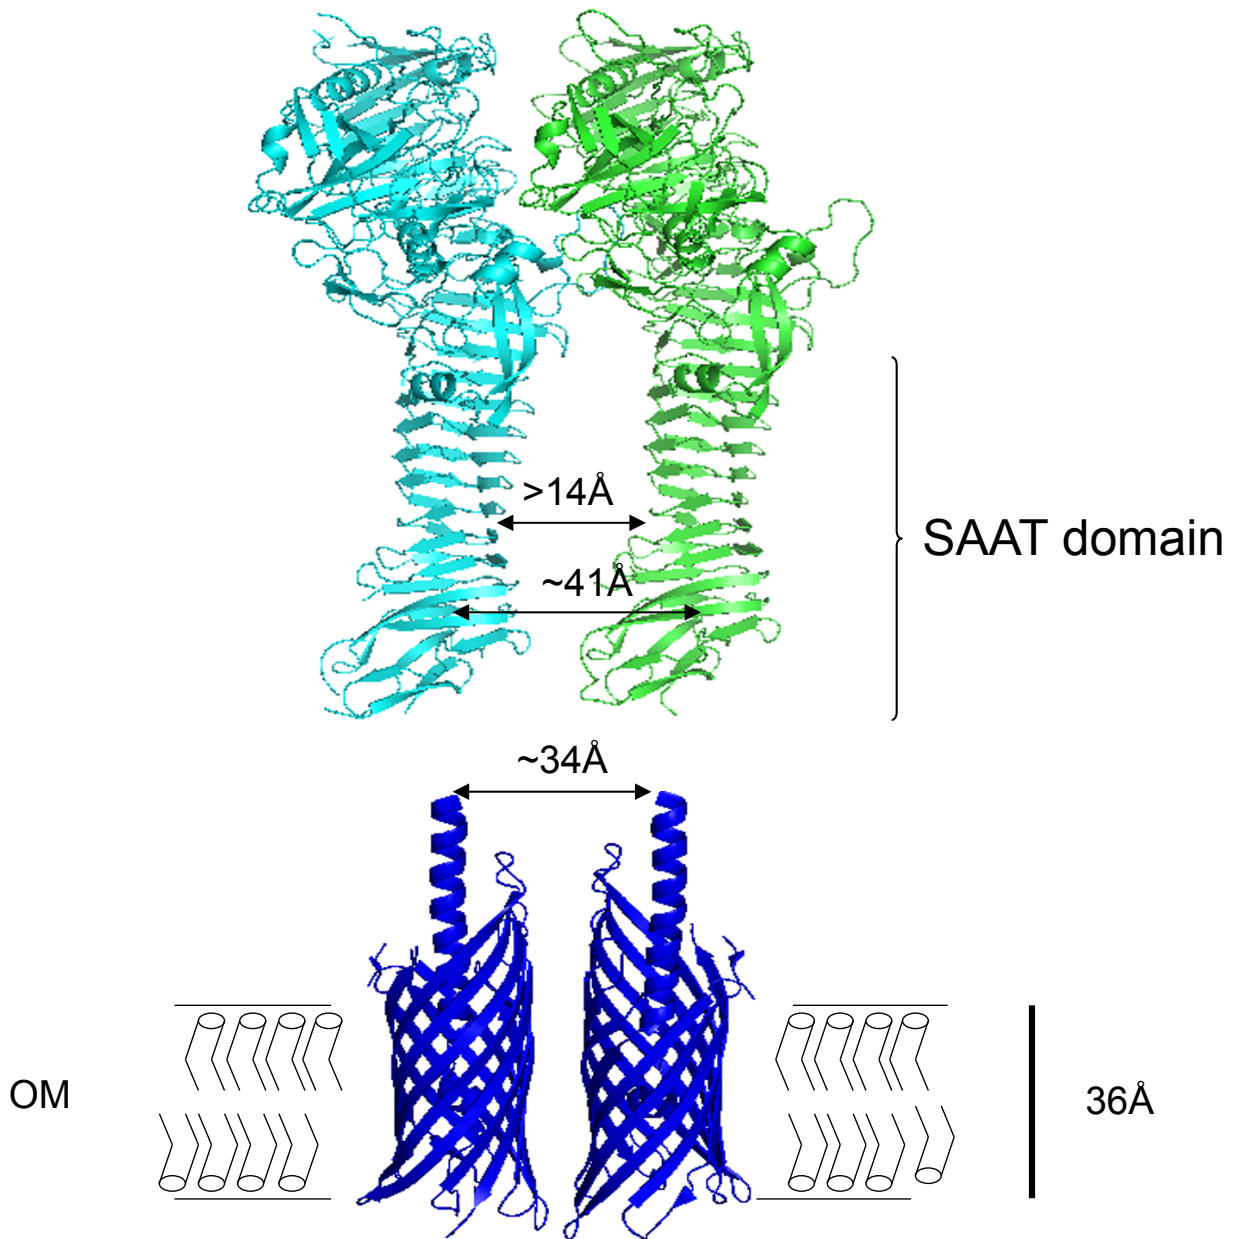

**Supplementary Table 1. Dynamic light scattering assay of purified Haps.**

| Temperature (°C) | Rd* (nM) | Polydispersity (%) | Baseline | SOS   |
|------------------|----------|--------------------|----------|-------|
| 4                | 986.1    | 33.2               | 0.097    | 1.029 |
| 10               | 1447.7   | 33.6               | 1.000    | 0.981 |
| 16               | 1509.7   | 42.2               | 0.999    | 1.708 |
| 22               | 1717.3   | 48.8               | 0.999    | 3.253 |
| 37               | 1902.6   | 56.1               | 1.003    | 8.722 |

\*Hydrodynamic radius (Rd) was calculated from 200 independent measurements.

## REFERENCES

- Baker NA, Sept D, Joseph S, Holst MJ, McCammon JA (2001) Electrostatics of nanosystems: application to microtubules and the ribosome. *Proc Natl Acad Sci U S A* **98**(18): 10037-10041
- Tajima N, Kawai F, Park SY, Tame JR (2010) A Novel Intein-Like Autoproteolytic Mechanism in Autotransporter Proteins. *J Mol Biol* **402**(4): 645-656
